# Supplementary material for: A novel metric to improve mismatched primer selection and quantification accuracy in amplifying DNA repeats for quantitative polymerase chain reactions
Source: PLoS One. 2023 Oct 9;18(10):e0292559. doi: 10.1371/journal.pone.0292559 (PMC10561853; doi:10.1371/journal.pone.0292559)
Supplement: S4 Table — (XLSX) [file pone.0292559.s005.xlsx]

## Sheet: Sheet1
Supplemental Table 4. PCR efficiency E and estimated initial target quantity N0 values for reactions using Cycling Program #2 - #4. Values are expressed in mean±SD from triplicate wells.
Cycling program	Template	Template quantity (pg)	100 nM Primer pair
			Tel1/tel2		tel1b/tel2b		telg/telc		36B4		IFNB1
			E	N0	E	N0	E	N0	E	N0	E	N0
#2 (49oC - 60oC)	Tel-36B4-ds	6	1.76±1.63x10-2	(5.19±0.24) x10-6	1.78±1.09x10-2	(1.19±0.26) x10-4	1.79±2.62x10-2	(6.39±0.48) x10-6	1.84±3.54x10-3	(2.95±0.26) x10-3
		0.6	1.77±1.35x10-2	(4.40±0.55) x10-7	1.77±2.55x10-2	(1.25±0.03) x10-5	1.78±2.05x10-2	(6.39±0.84) x10-7	1.74±4.62x10-2	(2.41±0.45) x10-4
		0.06	1.77±5.19x10-2	(7.26±0.44) x10-8	1.79±6.38x10-3	(1.87±0.12) x10-6	1.80±3.21x10-2	(8.15±0.47) x10-8	1.80±4.06x10-2	(3.82±0.53) x10-5
	Tel-IFNB1-ds	6	1.79±2.43x10-2	(1.44±0.08) x10-5	1.78±2.23x10-2	(2.99±0.05) x10-4	1.77±3.02x10-2	(1.13±0.02) x10-5			1.82±2.97x10-2	(5.27±0.13) x10-3
		0.6	1.77±2.93x10-2	(1.82±0.12) x10-6	1.79±1.23x10-2	(3.13±0.14) x10-5	1.78±1.78x10-2	(1.29±0.10) x10-6			1.77±1.53x10-2	(5.08±0.29) x10-4
		0.06	1.78±4.52x10-2	(2.69±0.09) x10-7	1.78±9.24x10-3	(4.72±0.22) x10-6	1.81±1.31x10-2	(1.79±0.12) x10-7			1.77±3.23x10-2	(7.93±0.65) x10-5
	IFNB1-36B4-ds	6							1.85±2.43x10-2	(5.91±0.18) x10-3	1.85±1.23x10-2	(5.33±0.05) x10-3
		0.6							1.79±8.18x10-3	(4.72±0.17) x10-4	1.76±4.39x10-2	(4.34±0.28) x10-4
		0.06							1.79±3.43x10-2	(7.02±0.75) x10-5	1.76±3.63x10-2	(6.53±0.30) x10-5
#3 (56oC - 60oC)	Tel-36B4-ds	6	1.76±5.68x10-3	(5.00±0.65) x10-6	1.77±3.73x10-2	(4.87±0.85) x10-4	1.77±1.37x10-2	(1.49±0.04) x10-5	1.82±3.61x10-2	(3.87±0.19) x10-3
		0.6	1.80±1.57x10-2	(4.75±0.27) x10-7	1.80±2.44x10-2	(4.55±0.32) x10-5	1.80±1.78x10-2	(1.54±0.13) x10-6	1.79±2.37x10-2	(2.96±0.23) x10-4
		0.06	1.74±9.08x10-3	(7.39±0.47) x10-8	1.79±2.00x10-2	(7.89±0.34) x10-6	1.80±2.55x10-2	(1.90±0.07) x10-7	1.79±1.40x10-2	(4.81±0.20) x10-5
	Tel-IFNB1-ds	6	1.72±1.80x10-2	(1.11±0.05) x10-5	1.74±2.12x10-2	(7.27±0.84) x10-4	1.73±9.66x10-3	(1.47±0.29) x10-5			1.83±2.33x10-2	(6.02±0.50) x10-3
		0.6	1.81±3.80x10-2	(1.15±0.11) x10-6	1.80±2.94x10-2	(7.24±0.52) x10-5	1.75±1.50x10-2	(1.97±0.03) x10-6			1.78±1.62x10-2	(5.42±0.43) x10-4
		0.06	1.80±3.50x10-2	(1.67±0.35) x10-7	1.79±2.37x10-2	(1.26±0.09) x10-5	1.79±2.54x10-2	(2.79±0.25) x10-7			1.77±7.46x10-3	(8.35±0.73) x10-5
	IFNB1-36B4-ds	6							1.89±1.06x10-2	(6.76±0.11) x10-3	1.83±2.63x10-2	(6.34±0.28) x10-3
		0.6							1.79±3.92x10-2	(5.60±0.38) x10-4	1.80±2.77x10-2	(5.55±0.26) x10-4
		0.06							1.78±2.67x10-2	(7.88±0.65) x10-5	1.76±1.64x10-2	(8.38±0.20) x10-5
#4 (60oC - 60oC)	Tel-36B4-ds	6	1.77±1.94x10-2	(3.93±0.39) x10-7	1.78±1.56x10-2	(3.05±0.09) x10-5	1.78±2.99x10-2	(2.02±0.70) x10-7	1.85±2.54x10-2	(3.43±0.14) x10-3
		0.6	1.77±1.62x10-2	(7.29±0.63) x10-8	1.78±8.65x10-4	(2.76±0.32) x10-6	1.81±4.03x10-2	(1.41±0.14) x10-8	1.77±6.59x10-3	(2.61±0.10) x10-4
		0.06	1.79±3.32x10-2	(1.42±0.84) x10-8	1.78±1.74x10-2	(3.94±0.28) x10-7	1.78±1.31x10-2	(1.63±0.38) x10-9	1.79±4.51x10-2	(3.96±0.18) x10-5
	Tel-IFNB1-ds	6	1.77±2.17x10-2	(7.00±0.46) x10-7	1.76±2.97x10-2	(4.12±0.23) x10-5	1.78±1.10x10-2	(1.40±0.17) x10-7			1.84±1.51x10-2	(5.60±0.57) x10-3
		0.6	1.80±2.11x10-2	(7.54±0.65) x10-8	1.79±2.54x10-2	(4.43±0.16) x10-6	1.79±1.63x10-2	(1.75±0.23) x10-8			1.78±2.32x10-2	(5.83±0.46) x10-4
		0.06	1.79±1.71x10-2	(9.46±1.45) x10-9	1.79±1.93x10-2	(6.83±0.62) x10-7	1.76±1.71x10-2	(2.31±0.50) x10-9			1.76±2.05x10-2	(5.29±1.84) x10-5
	IFNB1-36B4-ds	6							1.87±1.02x10-2	(4.96±0.63) x10-3	1.84±9.51x10-3	(5.36±0.12) x10-3
		0.6							1.75±3.30x10-2	(4.32±0.25) x10-4	1.77±1.25x10-2	(4.58±0.10) x10-4
		0.06							1.79±5.43x10-2	(5.62±0.02) x10-5	1.79±1.74x10-2	(6.27±0.18) x10-5
Cycling program	Template	Template quantity (pg)	500 nM Primer pair
			Tel1/tel2		tel1b/tel2b		telg/telc		36B4		IFNB1
			E	N0	E	N0	E	N0	E	N0	E	N0
#2 (49oC - 60oC)	Tel-36B4-ds	6	1.82±3.03x10-2	(6.11±0.14) x10-6	1.82±4.33x10-3	(1.72±0.24) x10-4	1.82±7.61x10-3	(1.15±0.07) x10-5	1.83±1.58x10-2	(2.23±0.14) x10-3
		0.6	1.82±1.07x10-2	(4.45±0.68) x10-7	1.84±1.67x10-2	(1.18±0.05) x10-5	1.79±1.64x10-2	(1.04±0.33) x10-6	1.80±1.78x10-2	(1.23±0.11) x10-4
		0.06	1.82±1.15x10-2	(7.63±0.22) x10-8	1.83±1.94x10-2	(1.67±0.18) x10-6	1.81±9.27x10-3	(9.96±0.51) x10-8	1.81±6.52x10-3	(1.75±0.16) x10-5
	Tel-IFNB1-ds	6	1.82±1.48x10-2	(2.36±0.20) x10-5	1.82±2.57x10-3	(5.01±0.18) x10-4	1.83±3.40x10-2	(1.99±0.07) x10-5			1.83±1.40x10-2	(4.33±0.30) x10-3
		0.6	1.82±1.41x10-2	(3.00±0.18) x10-6	1.84±1.08x10-2	(5.63±0.20) x10-5	1.80±8.19x10-3	(2.45±0.23) x10-6			1.79±1.19x10-2	(5.38±0.15) x10-4
		0.06	1.81±3.79x10-2	(3.80±0.15) x10-7	1.84±2.91x10-2	(7.78±0.51) x10-6	1.81±1.65x10-2	(3.48±0.42) x10-7			1.79±9.05x10-3	(7.04±0.30) x10-5
	IFNB1-36B4-ds	6							1.87±1.72x10-2	(6.22±0.29) x10-3	1.82±1.23x10-2	(5.85±0.07) x10-3
		0.6							1.83±3.19x10-2	(4.92±0.26) x10-4	1.79±1.17x10-2	(4.48±0.22) x10-4
		0.06							1.80±1.95x10-2	(6.64±0.28) x10-5	1.79±2.43x10-2	(6.95±0.07) x10-5
#3 (56oC - 60oC)	Tel-36B4-ds	6	1.80±2.08x10-2	(4.56±0.71) x10-6	1.83±2.58x10-3	(6.19±0.56) x10-4	1.82±2.45x10-2	(4.03±0.27) x10-5	1.81±6.66x10-3	(1.66±0.22) x10-3
		0.6	1.83±1.06x10-2	(4.91±0.27) x10-7	1.83±5.42x10-3	(4.22±0.39) x10-5	1.82±1.43x10-2	(3.25±0.31) x10-6	1.81±2.20x10-2	(8.49±0.07) x10-5
		0.06	1.82±1.76x10-2	(6.42±0.78) x10-8	1.81±2.35x10-2	(4.44±0.62) x10-6	1.82±1.16x10-2	(3.14±0.04) x10-7	1.80±1.80x10-2	(1.34±0.20) x10-5
	Tel-IFNB1-ds	6	1.84±1.59x10-2	(1.79±0.02) x10-5	1.85±3.39x10-2	(1.31±0.09) x10-3	1.80±1.60x10-2	(5.18±0.10) x10-5			1.81±2.50x10-2	(3.66±0.36) x10-3
		0.6	1.79±1.55x10-2	(2.13±0.02) x10-6	1.83±1.01x10-2	(1.46±0.15) x10-4	1.81±1.61x10-2	(6.19±0.35) x10-6			1.79±2.67x10-2	(4.12±0.28) x10-4
		0.06	1.81±3.24x10-2	(2.78±0.29) x10-7	1.84±2.46x10-2	(1.91±0.09) x10-5	1.79±1.46x10-2	(8.71±0.13) x10-7			1.81±2.23x10-2	(5.27±0.33) x10-5
	IFNB1-36B4-ds	6							1.87±3.97x10-3	(5.56±0.23) x10-3	1.84±1.20x10-2	(4.62±0.17) x10-3
		0.6							1.80±4.18x10-3	(3.90±0.27) x10-4	1.80±9.35x10-3	(3.41±0.08) x10-4
		0.06							1.82±2.74x10-2	(5.34±0.43) x10-5	1.80±6.01x10-3	(4.99±0.22) x10-5
#4 (60oC - 60oC)	Tel-36B4-ds	6	1.83±9.94x10-3	(1.65±0.26) x10-6	1.82±1.60x10-2	(1.84±0.13) x10-4	1.82±7.63x10-3	(2.17±0.22) x10-6	1.83±2.67x10-2	(3.08±0.09) x10-3
		0.6	1.82±1.08x10-2	(2.13±0.64) x10-7	1.82±1.14x10-2	(1.41±0.02) x10-5	1.80±3.94x10-3	(1.77±0.12) x10-7	1.82±2.29x10-2	(1.80±0.14) x10-4
		0.06	1.82±3.25x10-2	(1.63±0.28) x10-8	1.82±1.80x10-2	(1.27±0.20) x10-6	1.80±2.37x10-2	(1.79±0.07) x10-8	1.81±1.71x10-2	(2.46±0.04) x10-5
	Tel-IFNB1-ds	6	1.81±4.94x10-2	(3.18±0.05) x10-6	1.83±9.19x10-3	(2.40±0.07) x10-4	1.82±7.28x10-3	(2.19±0.40) x10-6			1.85±2.81x10-3	(4.80±0.24) x10-3
		0.6	1.79±1.41x10-2	(3.97±0.22) x10-7	1.82±1.92x10-2	(3.26±0.88) x10-5	1.81±3.54x10-2	(2.32±0.11) x10-7			1.83±2.29x10-2	(5.86±0.11) x10-4
		0.06	1.81±2.56x10-2	(6.19±0.70) x10-8	1.83±2.42x10-2	(4.15±0.10) x10-6	1.80±2.67x10-2	(5.17±1.11) x10-8			1.79±1.15x10-2	(7.85±0.31) x10-5
	IFNB1-36B4-ds	6							1.88±1.75x10-2	(6.22±0.25) x10-3	1.87±1.58x10-2	(5.83±0.13) x10-3
		0.6							1.82±1.20x10-2	(5.53±0.28) x10-4	1.80±1.78x10-2	(5.08±0.09) x10-4
		0.06							1.79±7.48x10-3	(7.03±0.80) x10-5	1.82±2.63x10-2	(6.78±0.20) x10-5
Cycling program	Template	Template quantity (pg)	900 nM Primer pair
			Tel1/tel2		tel1b/tel2b		telg/telc		36B4		IFNB1
			E	N0	E	N0	E	N0	E	N0	E	N0
#2 (49oC - 60oC)	Tel-36B4-ds	6	1.82±2.04x10-2	(7.98±0.49) x10-6	1.86±4.66x10-2	(1.77±0.17) x10-4	1.83±1.13x10-2	(1.26±0.09) x10-5	1.82±2.08x10-2	(1.23±0.09) x10-3
		0.6	1.85±2.30x10-2	(8.39±0.58) x10-7	1.84±2.12x10-2	(2.24±0.76) x10-5	1.78±1.13x10-2	(1.55±0.11) x10-6	1.82±1.57x10-2	(1.21±0.05) x10-4
		0.06	1.84±2.59x10-2	(1.97±0.18) x10-7	1.82±9.53x10-3	(3.98±0.54) x10-6	1.88±8.09x10-3	(2.76±0.36) x10-7	1.83±1.19x10-2	(3.28±0.10) x10-5
	Tel-IFNB1-ds	6	1.85±2.88x10-3	(3.89±0.16) x10-5	1.86±1.19x10-2	(7.14±0.38) x10-4	1.84±6.00x10-3	(2.73±0.06) x10-5			1.85±1.56x10-2	(3.94±0.07) x10-3
		0.6	1.82±2.77x10-2	(6.06±0.49) x10-6	1.87±3.38x10-2	(9.90±0.68) x10-5	1.84±4.07x10-3	(4.08±0.17) x10-6			1.83±2.18x10-2	(6.80±0.41) x10-4
		0.06	1.82±4.08x10-2	(7.42±0.48) x10-7	1.84±1.77x10-2	(1.23±0.08) x10-5	1.89±2.88x10-2	(5.19±0.31) x10-7			1.82±2.77x10-2	(7.89±0.09) x10-5
	IFNB1-36B4-ds	6							1.87±7.54x10-3	(8.65±0.12) x10-3	1.86±1.49x10-2	(7.16±0.08) x10-3
		0.6							1.83±5.73x10-3	(8.24±0.33) x10-4	1.81±1.96x10-2	(7.02±0.13) x10-4
		0.06							1.85±2.11x10-2	(8.73±0.32) x10-5	1.82±8.55x10-3	(7.06±0.18) x10-5
#3 (56oC - 60oC)	Tel-36B4-ds	6	1.82±4.32x10-3	(7.49±0.27) x10-6	1.85±5.07x10-3	(4.68±0.78) x10-4	1.85±1.09x10-2	(4.75±0.18) x10-5	1.83±1.47x10-2	(1.02±0.01) x10-3
		0.6	1.83±2.70x10-2	(7.46±0.80) x10-7	1.83±1.56x10-2	(4.35±0.86) x10-5	1.84±2.87x10-2	(5.64±0.28) x10-6	1.80±8.79x10-3	(1.01±0.05) x10-4
		0.06	1.83±5.76x10-3	(1.54±0.08) x10-7	1.85±1.12x10-2	(8.46±0.54) x10-6	1.84±1.26x10-2	(8.04±0.41) x10-7	1.81±1.45x10-2	(2.47±0.18) x10-5
	Tel-IFNB1-ds	6	1.84±2.29x10-2	(3.58±0.05) x10-5	1.90±1.72x10-2	(1.76±0.02) x10-3	1.83±2.75x10-2	(8.66±0.36) x10-5			1.85±1.53x10-2	(3.51±0.18) x10-3
		0.6	1.87±1.26x10-2	(4.74±0.36) x10-6	1.84±1.76x10-2	(2.26±0.20) x10-4	1.83±1.25x10-2	(1.14±0.007) x10-5			1.82±5.18x10-2	(5.49±0.34) x10-4
		0.06	1.83±2.68x10-2	(5.76±0.99) x10-7	1.87±1.39x10-2	(2.47±0.13) x10-5	1.83±1.74x10-3	(1.46±0.01) x10-6			1.80±1.28x10-2	(6.15±0.34) x10-5
	IFNB1-36B4-ds	6							1.90±1.88x10-2	(6.96±0.19) x10-3	1.85±1.31x10-2	(6.24±0.17) x10-3
		0.6							1.83±1.25x10-2	(6.05±0.26) x10-4	1.79±1.58x10-2	(5.22±0.46) x10-4
		0.06							1.84±2.39x10-2	(6.38±0.36) x10-5	1.82±4.99x10-3	(5.49±0.06) x10-5
#4 (60oC - 60oC)	Tel-36B4-ds	6	1.83±3.01x10-2	(1.52±0.11) x10-6	1.83±2.31x10-2	(1.55±0.10) x10-4	1.83±3.19x10-2	(1.50±0.13) x10-6	1.84±3.74x10-2	(1.23±0.13) x10-3
		0.6	1.84±2.32x10-3	(1.46±0.26) x10-7	1.84±5.52x10-3	(1.67±0.07) x10-5	1.81±1.53x10-2	(1.93±0.08) x10-7	1.85±2.51x10-2	(1.38±0.10) x10-4
		0.06	1.82±3.60x10-2	(3.68±0.10) x10-8	1.83±1.28x10-2	(2.83±0.57) x10-6	1.81±1.28x10-2	(2.82±0.24) x10-8	1.83±2.80x10-2	(3.24±0.03) x10-5
	Tel-IFNB1-ds	6	1.83±4.64x10-2	(3.80±0.60) x10-6	1.85±1.22x10-2	(3.11±0.58) x10-4	1.81±2.25x10-2	(2.81±0.24) x10-6			1.83±2.80x10-3	(4.27±0.16) x10-3
		0.6	1.81±3.00x10-2	(5.43±0.86) x10-7	1.84±4.39x10-2	(5.84±0.73) x10-5	1.81±2.23x10-2	(3.68±0.31) x10-7			1.80±2.01x10-2	(6.68±0.48) x10-4
		0.06	1.81±1.31x10-2	(8.60±1.03) x10-8	1.84±2.41x10-2	(6.74±0.70) x10-6	1.84±1.94x10-2	(5.29±0.24) x10-8			1.80±6.75x10-3	(8.01±0.27) x10-5
	IFNB1-36B4-ds	6							1.89±3.85x10-3	(7.93±0.29) x10-3	1.87±1.85x10-2	(6.78±0.26) x10-3
		0.6							1.82±1.06x10-2	(7.40±0.45) x10-4	1.81±1.27x10-2	(6.57±0.15) x10-4
		0.06							1.82±2.73x10-2	(8.84±0.25) x10-5	1.80±6.48x10-3	(7.30±0.21) x10-5
